# Supplementary material
Source: PubMed Central journal article supplement (PMC6092236)
Supplement: NIHMS965343-supplement-Supplemental_Data.pdf [file NIHMS965343-supplement-Supplemental_Data.pdf]

# Supplemental Figure 1

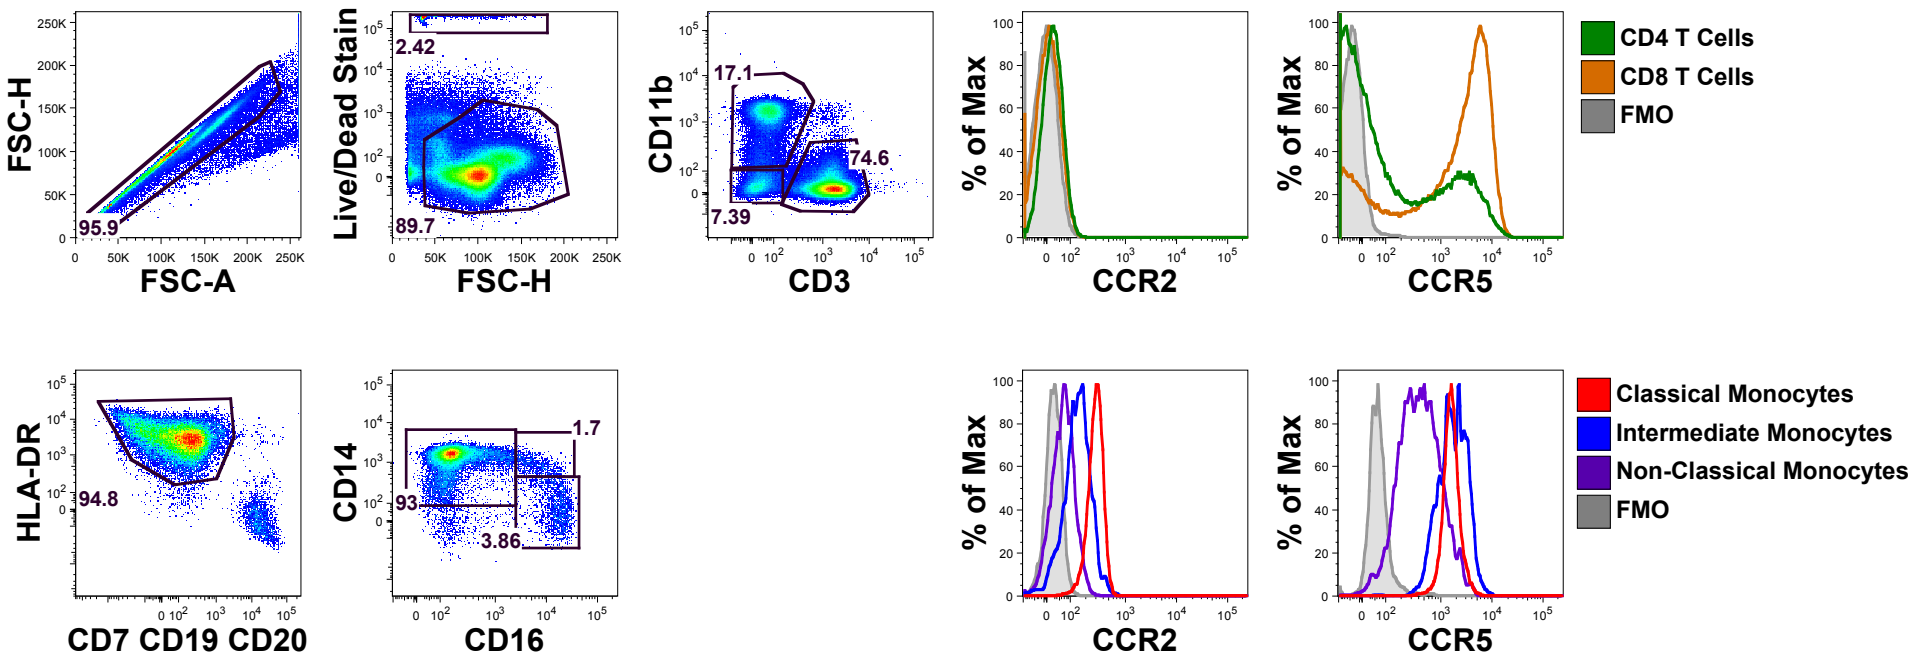

# Supplemental Table 1: 24-week changes in neuropsychological test scores

| Cognitive Domain       | NPZ Test                              | 24-Week Change             | P-Value      |
|------------------------|---------------------------------------|----------------------------|--------------|
| Attention              | <b>CalCap Choice</b>                  | <b>0.57 (-0.45, 1.18)</b>  | <b>0.071</b> |
| Attention              | CalCap Sequential                     | 0.25 (-0.29, 0.68)         | 0.353        |
| Attention              | <b>Digit Span Total</b>               | <b>0.33 (0, 0.66)</b>      | <b>0.094</b> |
| Working Memory         | CVLT B                                | 0.50 (0, 1.00)             | 0.270        |
| Working Memory         | <b>Digit Span Backward</b>            | <b>0.33 (0, 1.33)</b>      | <b>0.065</b> |
| Working Memory         | <b>Letter Number</b>                  | <b>0.33 (0, 1.00)</b>      | <b>0.029</b> |
| Psychomotor Speed      | Grooved Pegboard: Dominant            | 0.09 (-0.23, 0.91)         | 0.555        |
| Psychomotor Speed      | <b>Grooved Pegboard: Non-Dominant</b> | <b>0.55 (0.40, 0.78)</b>   | <b>0.015</b> |
| Psychomotor Speed      | Trail A                               | 0.03 (-0.45, 0.43)         | 0.817        |
| Psychomotor Speed      | Digit Symbol                          | 0.33 (-0.33, 0.33)         | 0.343        |
| Visuospatial Reasoning | Rey Copy                              | 0.33 (0, 0.67)             | 0.185        |
| Visuospatial Reasoning | <b>Block Design</b>                   | <b>0 (0, 0.67)</b>         | <b>0.062</b> |
| Executive Function     | Action                                | -0.24 (-0.68, 0.66)        | 1.00         |
| Executive Function     | FAS                                   | 0.34 (-0.33, 1.00)         | 0.192        |
| Executive Function     | <b>Stroop</b>                         | <b>0.33 (0, 0.34)</b>      | <b>0.010</b> |
| Executive Function     | Trail B                               | 0.12 (-0.57, 1.07)         | 0.517        |
| Learning and Memory    | BVMT Delayed Recall                   | 0 (-0.87, 1.25)            | 0.553        |
| Learning and Memory    | BVMT Total                            | 0.19 (-0.98, 1.30)         | 0.441        |
| Learning and Memory    | CVLT Total                            | 0.40 (-0.10, 0.90)         | 0.170        |
| Learning and Memory    | CVLT Long Delay Free Recall           | -0.50 (-1.00, 0.50)        | 0.231        |
| Gross Motor            | <b>Timed Gait</b>                     | <b>-0.99 (-1.96, 0.30)</b> | <b>0.009</b> |
| Gross Motor            | <b>Finger Tap Dominant</b>            | <b>0.44 (0, 0.84)</b>      | <b>0.032</b> |
| Gross Motor            | <b>Finger Tap Non-Dominant</b>        | <b>0.34 (0, 0.80)</b>      | <b>0.030</b> |
